# Supplementary material for: Neonatal Hypoxic-Ischemic Brain Injury Alters Brain Acylcarnitine Levels in a Mouse Model
Source: MDPI journal article supplement (doi:10.3390/metabo12050467), 2022-05-22
Supplement: s1 [file s1]

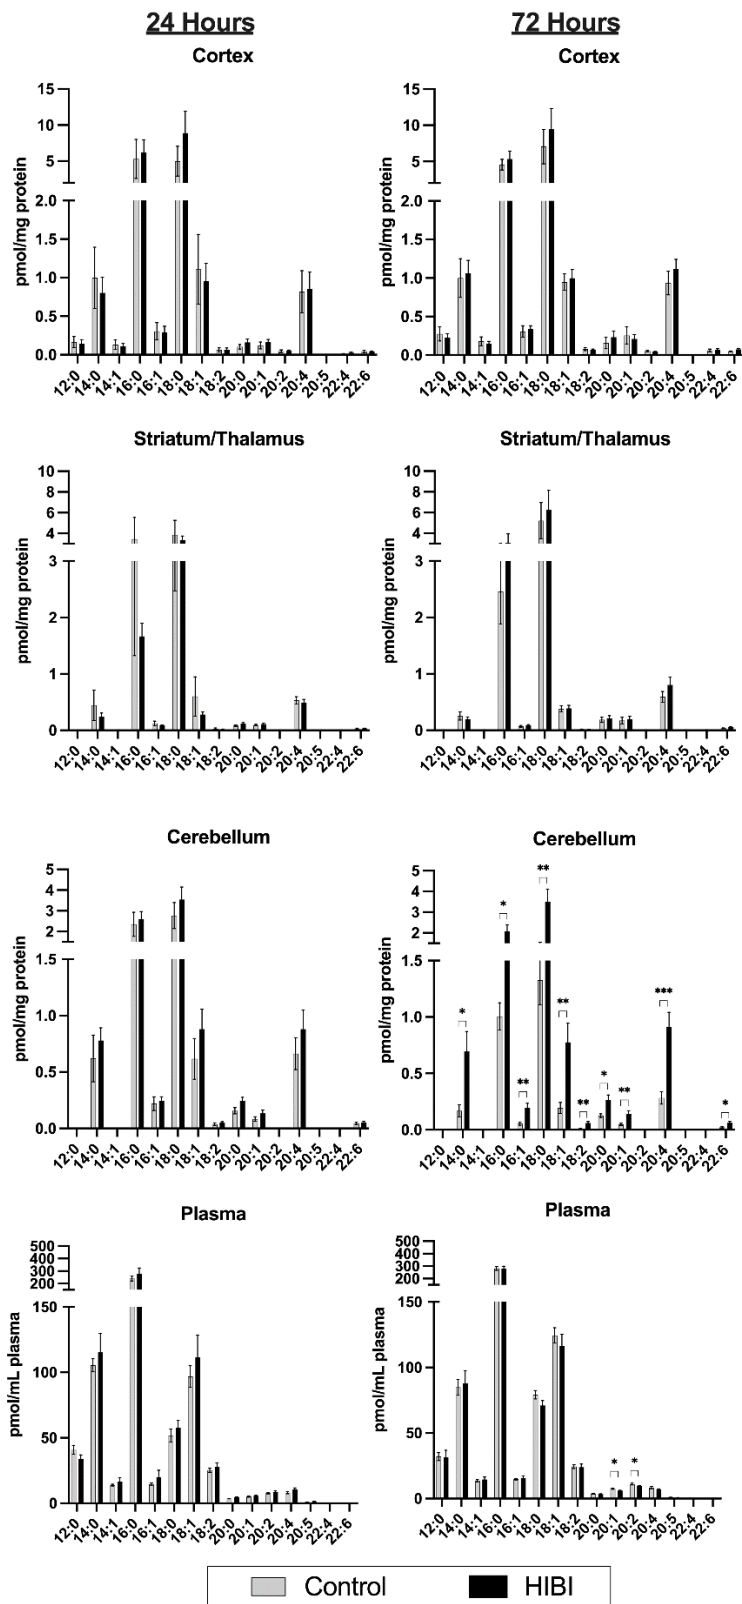

Supplemental Figure S1. Acylcarnitine changes at 24 and 72 hours after HIBI versus controls in each brain region and plasma. \* $p < 0.05$ , \*\* $p < 0.01$ , \*\*\* $p < 0.001$ , \*\*\*\* $p < 0.0001$ .

### 30 Minutes After Injury

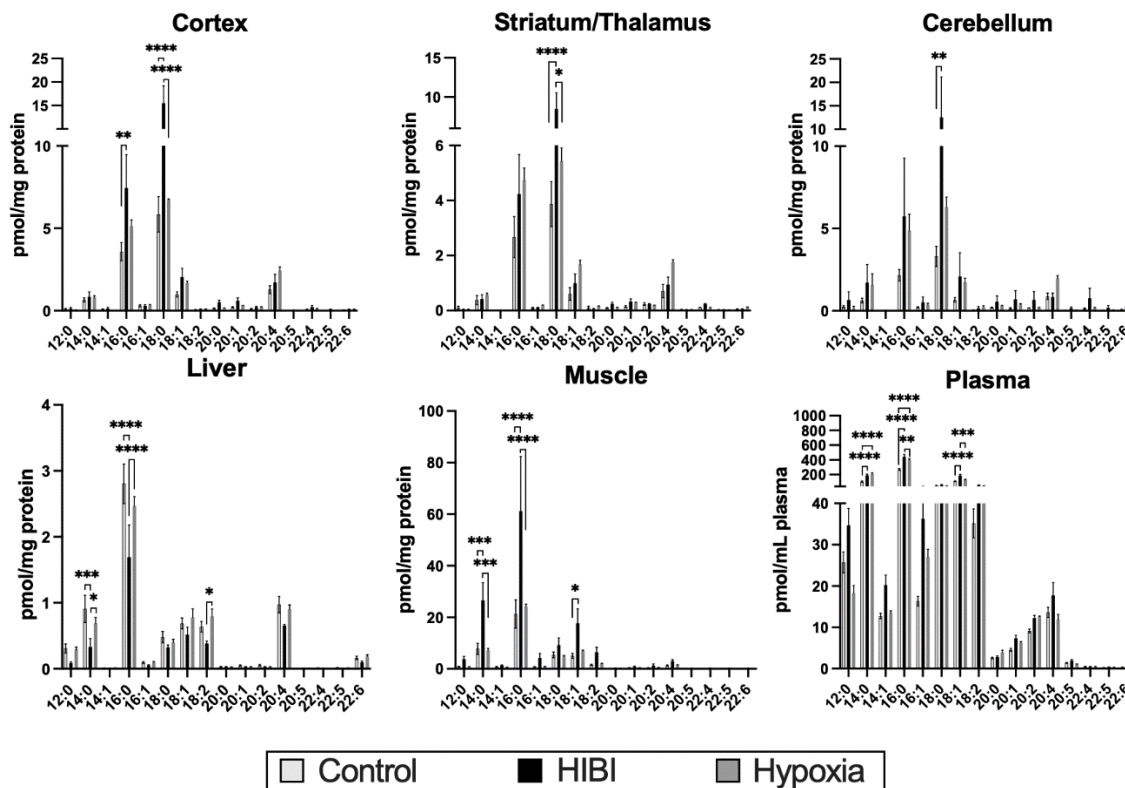

Supplemental Figure S2. All acylcarnitine species levels in brain regions, liver, muscle, and plasma under all three conditions. \* $p < 0.05$ , \*\* $p < 0.01$ , \*\*\* $p < 0.001$ , \*\*\*\* $p < 0.0001$ .
